# Supplementary material for: Extraction of Proanthocyanidins from Chinese Wild Rice (Zizania latifolia) and Analyses of Structural Composition and Potential Bioactivities of Different Fractions
Source: PubMed Central journal article supplement (PMC6539017; doi:10.3390/molecules24091681), 2019-04-30
Supplement: molecules-24-01681-s001.pdf [file molecules-24-01681-s001.pdf]

**Table S1.** Box–Behnken design with coded and actual values for the extraction conditions and response values for the content of wild rice proanthocyanidins (WRPs).

| Run | Extraction Variables |                |                |                | WRPs Content (mg/g rice) |           |
|-----|----------------------|----------------|----------------|----------------|--------------------------|-----------|
|     | X <sub>1</sub>       | X <sub>2</sub> | X <sub>3</sub> | X <sub>4</sub> | Experimental             | Predicted |
| 1   | 1 (100)              | 0 (50)         | 1 (50)         | 0 (350)        | 4.90                     | 4.87      |
| 2   | 0 (90)               | 1 (60)         | 0 (40)         | 1 (400)        | 4.08                     | 4.17      |
| 3   | 0 (90)               | 0 (50)         | 1 (50)         | 1 (400)        | 5.57                     | 5.55      |
| 4   | 0 (90)               | 0 (50)         | 0 (50)         | 0 (350)        | 6.15                     | 6.09      |
| 5   | 0 (90)               | -1 (40)        | 0 (40)         | 1 (400)        | 5.05                     | 4.89      |
| 6   | 0 (90)               | 1 (60)         | 1 (50)         | 0 (350)        | 4.40                     | 4.45      |
| 7   | 0 (90)               | 0 (50)         | 1 (50)         | -1 (300)       | 5.36                     | 5.33      |
| 8   | 0 (90)               | -1 (40)        | 1 (50)         | 0 (350)        | 4.67                     | 4.52      |
| 9   | -1 (80)              | 1 (60)         | 0 (40)         | 0 (350)        | 2.77                     | 2.62      |
| 10  | -1 (80)              | 0 (50)         | 1 (50)         | 0 (350)        | 3.82                     | 3.86      |
| 11  | 1 (100)              | 0 (50)         | -1 (30)        | 0 (350)        | 5.76                     | 5.66      |
| 12  | 0 (90)               | 1 (60)         | 0 (40)         | -1 (300)       | 4.74                     | 4.83      |
| 13  | 1 (100)              | 0 (50)         | 0 (40)         | -1 (300)       | 5.39                     | 5.44      |
| 14  | 0 (90)               | -1 (40)        | 0 (40)         | -1 (300)       | 4.67                     | 4.65      |
| 15  | 0 (90)               | 0 (50)         | 0 (40)         | 0 (350)        | 6.09                     | 6.09      |
| 16  | 0 (90)               | -1 (40)        | -1 (30)        | 0 (350)        | 4.75                     | 4.85      |
| 17  | 0 (90)               | 0 (50)         | 0 (40)         | 0 (350)        | 5.97                     | 6.09      |
| 18  | 0 (90)               | 0 (50)         | 0 (40)         | 0 (350)        | 6.10                     | 6.09      |
| 19  | -1 (80)              | 0 (50)         | 0 (40)         | 1 (400)        | 3.67                     | 3.68      |
| 20  | 1 (100)              | 0 (50)         | 0 (40)         | 1 (400)        | 4.97                     | 5.01      |
| 21  | 0 (90)               | 0 (50)         | 0 (40)         | 0 (350)        | 6.13                     | 6.09      |
| 22  | 0 (90)               | 0 (50)         | -1 (30)        | -1 (300)       | 5.88                     | 5.90      |
| 23  | 0 (90)               | 1 (60)         | -1 (30)        | 0 (350)        | 4.65                     | 4.64      |
| 24  | -1 (80)              | -1 (40)        | 0 (40)         | 0 (350)        | 2.72                     | 2.83      |
| 25  | 1 (100)              | -1 (40)        | 0 (40)         | 0 (350)        | 4.31                     | 4.43      |
| 26  | -1 (80)              | 0 (50)         | -1 (30)        | 0 (350)        | 3.49                     | 3.46      |
| 27  | 0 (90)               | 0 (50)         | -1 (30)        | 1 (400)        | 5.35                     | 5.38      |
| 28  | -1 (80)              | 0 (50)         | 0 (40)         | -1 (300)       | 3.53                     | 3.55      |
| 29  | 1 (100)              | 1 (60)         | 0 (40)         | 0 (350)        | 4.30                     | 4.23      |

X<sub>1-4</sub>: composition of aqueous ethanol (EtOH %, *v/v*), liquid-solid ratio (mL/g, *v/w*), extraction temperature (°C), and ultrasonic power (W).

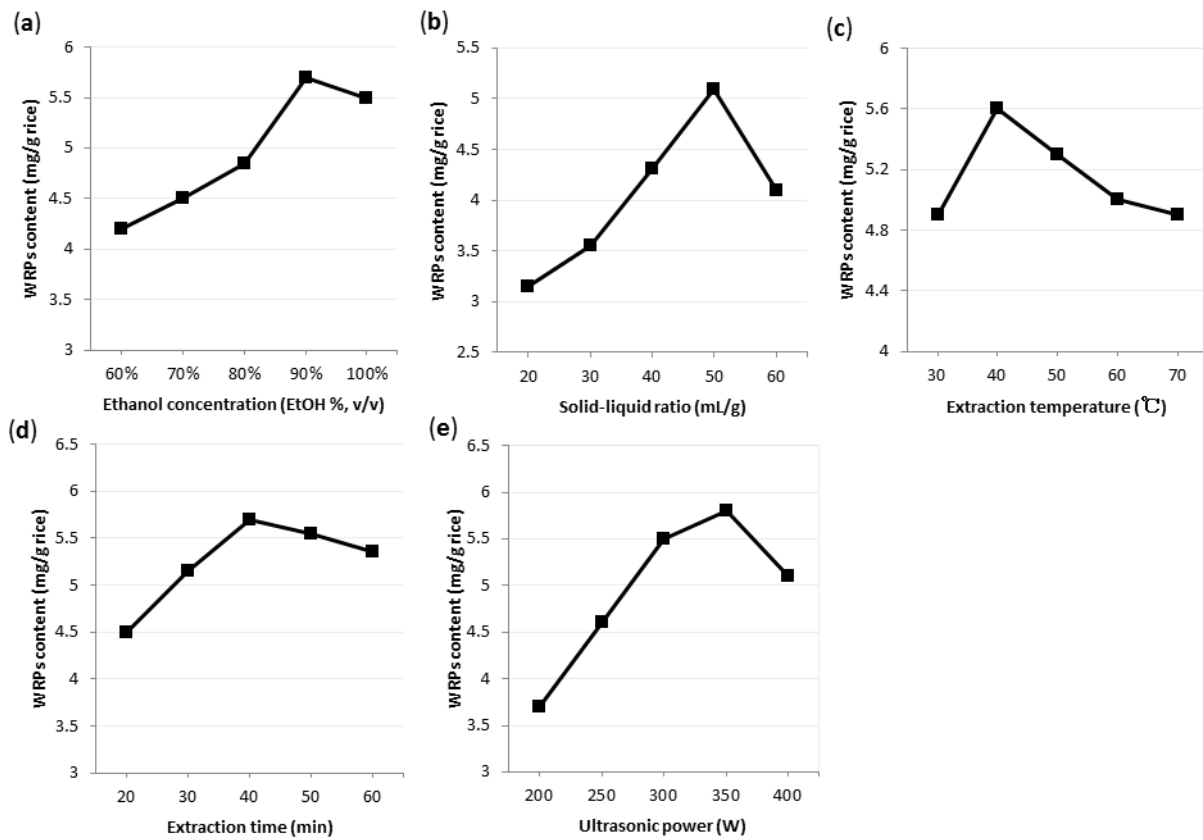

**Figure S1.** Effects of different extraction parameters on the content of wild rice proanthocyanidins in the single factor experiment.

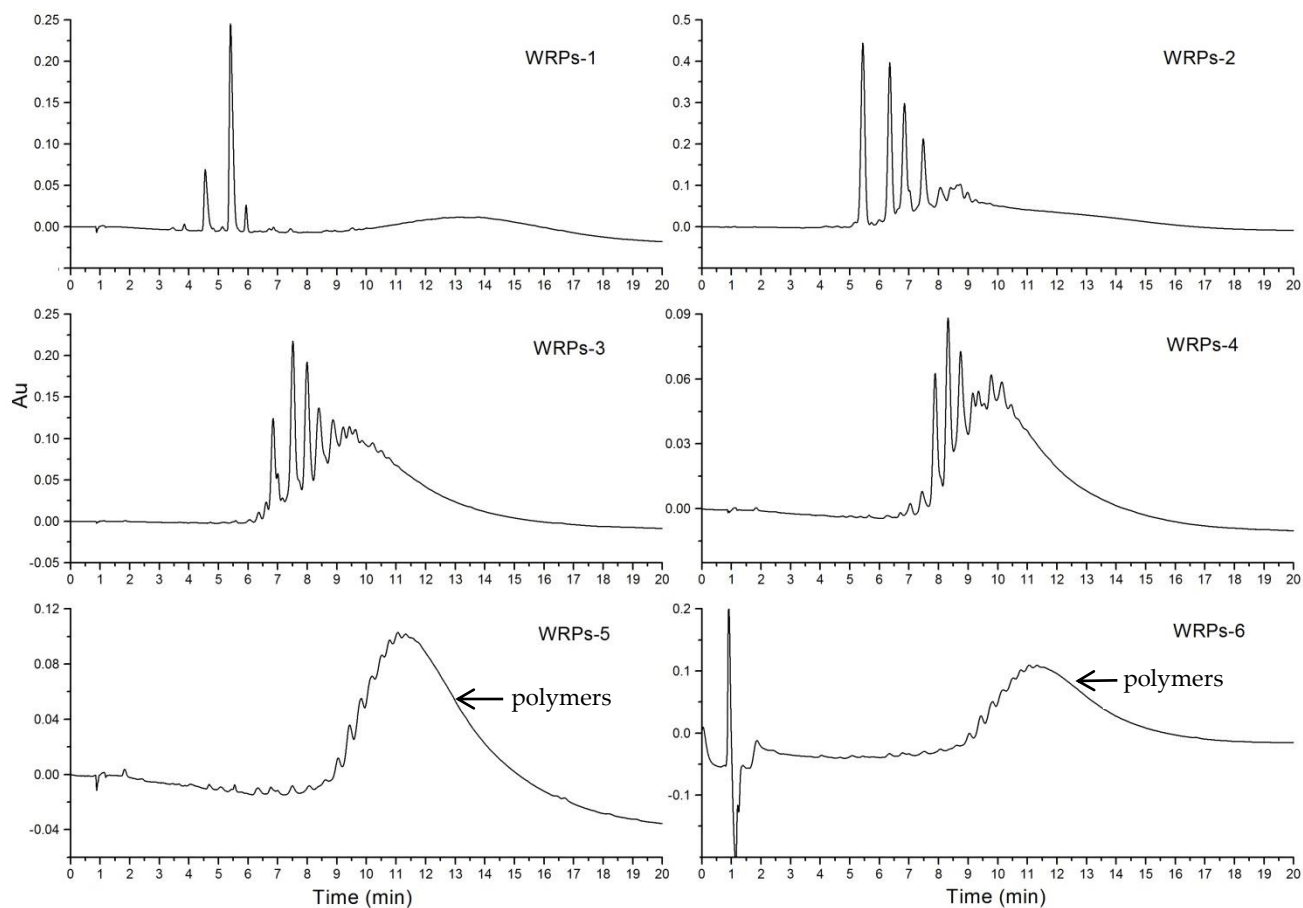

**Figure S2.** Reversed-phase UPLC chromatograms of fractions WRP-1–WRP-6 eluted from Sephadex LH-20 column at 280 nm. Some proanthocyanidin polymers could not be resolved but were co-eluted as a large unresolved peak. The gradient solvent system consisting of A (acetonitrile containing 0.1% acetic acid, *v/v*) and B (water containing 0.1% acetic acid, *v/v*) was as follows: 0–5 min, 5–7% A; 5–10 min, 7–10% A; 10–15 min, 10–20% A; 15–18 min, 20–90% A; 18–20 min, 90–5% A.
